# Supplementary material for: Inadequacy of Immune Health Nutrients: Intakes in US Adults, the 2005–2016 NHANES
Source: PubMed Central journal article supplement (PMC7352522; doi:10.3390/nu12061735), 2020-06-10
Supplement: nutrients-12-01735-s001.pdf [file nutrients-12-01735-s001.pdf]

**Table S1.** Micronutrient usual Intake (UI), prevalence of inadequacy (% of population below EAR) and % of population exceeding the UL from Food Only and Food + Supplements in all adults (> 19 y). NHANES 2005 – 2016.

| Nutrients                           | Usual Intake            |                               | % of Population Below EAR |                               | % Population Above UL   |                               |
|-------------------------------------|-------------------------|-------------------------------|---------------------------|-------------------------------|-------------------------|-------------------------------|
|                                     | Food Only<br>n = 26,282 | Food+Supplement<br>n = 21,248 | Food Only<br>n = 26,282   | Food+Supplement<br>n = 21,248 | Food Only<br>n = 26,282 | Food+Supplement<br>n = 21,248 |
| Calcium (mg)                        | 973.44 ± 6.01           | 1141.55 ± 9.02                | 42.91 ± 0.68              | 31.20 ± 0.71                  | 0.54 ± 0.05             | 4.27 ± 0.21                   |
| Copper (mg)                         | 1.30 ± 0.01             | 1.64 ± 0.01                   | 6.05 ± 0.36               | 4.60 ± 0.34                   | <0.01                   | 0.03 ± 0.01                   |
| Iron (mg)                           | 15.01 ± 0.08            | 18.42 ± 0.14                  | 5.20 ± 0.22               | 3.98 ± 0.21                   | 0.01 ± 0.00             | 1.79 ± 0.10                   |
| Magnesium (mg)                      | 305.43 ± 1.98           | 335.50 ± 3.11                 | 53.46 ± 0.85              | 45.61 ± 0.96                  | -                       | -                             |
| Phosphorus (mg)                     | 1390.39 ± 6.46          | 1402.48 ± 6.84                | 0.80 ± 0.11               | 0.76 ± 0.12                   | 0.01 ± 0.00             | 0.01 ± 0.00                   |
| Selenium (mcg)                      | 114.33 ± 0.61           | 129.55 ± 0.76                 | 0.50 ± 0.09               | 0.40 ± 0.08                   | <0.01                   | 0.12 ± 0.02                   |
| Zinc (mg)                           | 11.61 ± 0.07            | 15.93 ± 0.15                  | 15.41 ± 0.71              | 11.21 ± 0.63                  | <0.01                   | 2.21 ± 0.14                   |
| Vitamin A (mcg) <sup>1</sup>        | 639.36 ± 7.45           | 977.43 ± 15.44                | 45.21 ± 0.96              | 34.52 ± 0.89                  | <0.01                   | 2.09 ± 0.17                   |
| Thiamin (mg)                        | 1.63 ± 0.01             | 5.76 ± 0.40                   | 6.57 ± 0.46               | 4.61 ± 0.38                   | -                       | -                             |
| Riboflavin (mg)                     | 2.18 ± 0.01             | 4.69 ± 0.18                   | 2.86 ± 0.18               | 2.24 ± 0.17                   | -                       | -                             |
| Niacin (mg)                         | 26.00 ± 0.14            | 36.61 ± 0.74                  | 1.43 ± 0.16               | 0.91 ± 0.13                   | 16.29 ± 0.45            | 34.63 ± 0.60                  |
| Vitamin B6 (mg)                     | 2.12 ± 0.01             | 5.40 ± 0.17                   | 11.07 ± 0.56              | 7.44 ± 0.48                   | <0.01                   | 0.76 ± 0.09                   |
| Folate DFE (mcg)                    | 541.33 ± 3.92           | 763.51 ± 7.51                 | 12.05 ± 0.58              | 8.18 ± 0.51                   | -                       | -                             |
| Folic acid (mcg)                    | 188.41 ± 1.70           | 318.55 ± 3.65                 | -                         | -                             | <0.01                   | 1.86 ± 0.14                   |
| Vitamin B12 (mcg)                   | 5.20 ± 0.05             | 56.79 ± 3.17                  | 3.95 ± 0.31               | 2.57 ± 0.22                   | 30.44 ± 0.77            | 53.07 ± 0.69                  |
| Vitamin C (mg)                      | 82.88 ± 1.18            | 168.53 ± 4.06                 | 45.92 ± 0.94              | 32.90 ± 0.92                  | <0.01                   | 0.46 ± 0.09                   |
| Vitamin D (mcg) <sup>2</sup>        | 4.71 ± 0.05             | 13.88 ± 0.37                  | 94.90 ± 0.31              | 64.69 ± 0.56                  | <0.01                   | 1.34 ± 0.15                   |
| Vitamin E (mg) <sup>3</sup>         | 8.64 ± 0.08             | 27.76 ± 1.00                  | 83.70 ± 0.67              | 59.34 ± 0.77                  | -                       | -                             |
| <b>Nutrients with AI, (% above)</b> |                         |                               |                           |                               |                         |                               |
| Vitamin K (mcg)                     | 110.63 ± 1.73           | 116.88 ± 2.35                 | 44.92 ± 1.17              | 48.51 ± 1.34                  | -                       | -                             |
| Total choline (mg)                  | 335.73 ± 1.69           | 336.51 ± 1.91                 | 7.55 ± 0.47               | 7.70 ± 0.50                   | <0.01                   | <0.01                         |

<sup>1</sup> Vitamin A as mcg RAE (retinoic acid equivalents); <sup>2</sup> Vitamin D as mcg of Vitamin D2+Vitamin D3; <sup>3</sup> Vitamin E as mg of atocopherol.
